# Supplementary material for: An ultrasensitive electrochemical sensor based on in situ synthesized manganese dioxide/gold nanoparticles nanocomposites for rapid detection of methylmercury in foodstuffs
Source: Royal Society of Chemistry journal article supplement (doi:10.1039/d2ay00417h), 2022-01-01

# **Ultrasensitive electrochemical sensor based on in-situ synthesized manganese dioxide / gold nanoparticles nanocomposites for rapid detection of methylmercury in foodstuffs**

Yi Zhang, Yanqing Wu, Lishen Su, Chunlin Zhu, Xiaoping Wu\*

*Key Laboratory for Analytical Science of Food Safety and Biology; College of Chemistry, Fuzhou University, Fuzhou 350116, China*

\* Corresponding author: Xiaoping Wu

Postal address: College of Chemistry, Fuzhou University, Fuzhou 350116, China

Tel.: +86-591-22866131;

Fax: +86-591-22866131;

E-mail: wapple@fzu.edu.cn (X. Wu)

**Fig. S1** The CV curve for electrodeposition of  $\text{MnO}_2$  on GCE in 0.1 mol/L  $\text{H}_2\text{SO}_4$  aqueous solution containing 5 mmol/L  $\text{MnSO}_4$ . Scan rate: 50 mV/s.

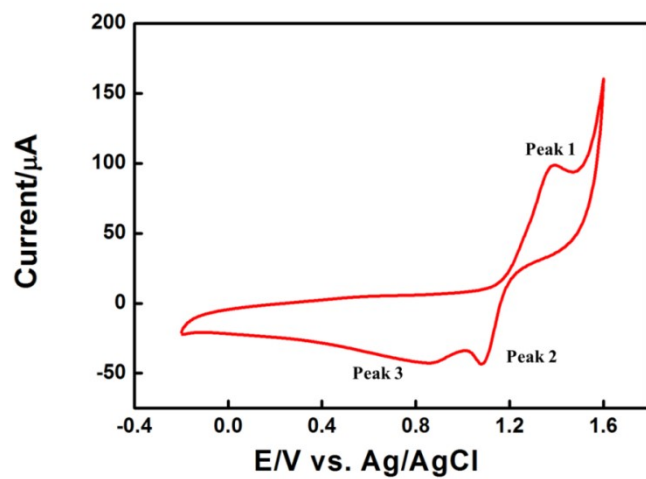

**Fig. S2** Cyclic voltammograms in a 0.1 mol/L KCl solution containing 5 mmol/L  $\text{Fe}(\text{CN})_6^{3-/4-}$  at different scan rates, and corresponding linear relationship between redox peak currents and the scan rates using  $\text{MnO}_2/\text{GCE}(\text{A,B})$ ,  $\text{AuNPs}/\text{GCE}(\text{C,D})$ , and  $\text{MnO}_2/\text{AuNPs}/\text{GCE}(\text{E,F})$

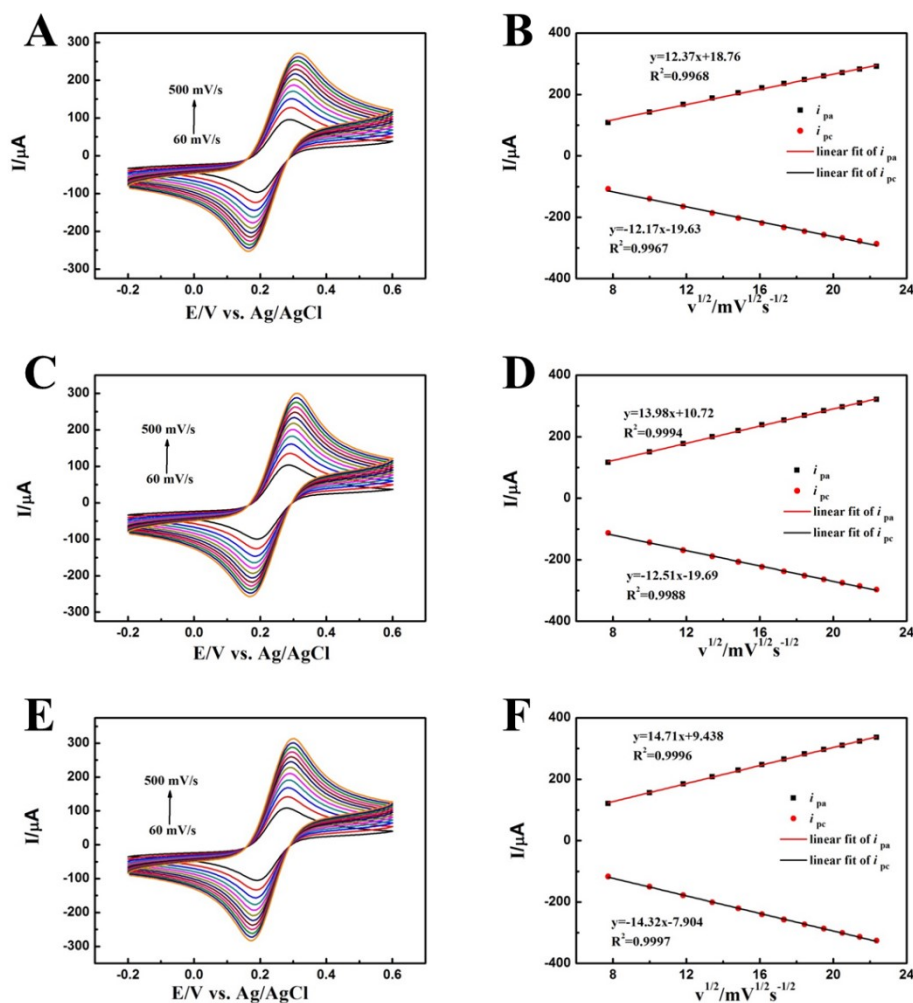

**Fig. S3** (A) CV curves of  $\text{MnO}_2/\text{AuNPs}/\text{GCE}$  towards  $10\text{ }\mu\text{g/L}$   $\text{CH}_3\text{Hg}^+$  at different scan rates in  $0.1\text{ mol/L}$  acetate buffer solution ( $\text{pH } 5.0$ ). (B) Corresponding linear relationship between redox peak currents and scan rates.

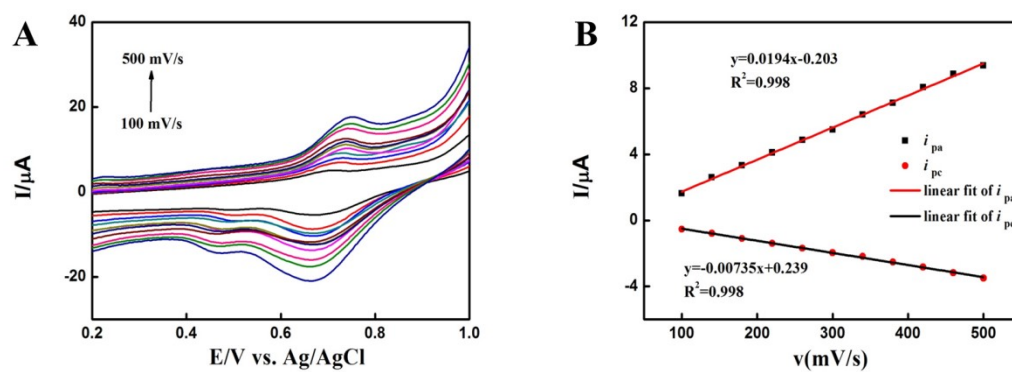

**Fig. S4** The influences of (A) deposition cycles for  $\text{MnO}_2$ , (B) pH, (C) accumulation potential and (D) accumulation time on the peak current of  $10\ \mu\text{g/L}\ \text{CH}_3\text{Hg}^+$ .

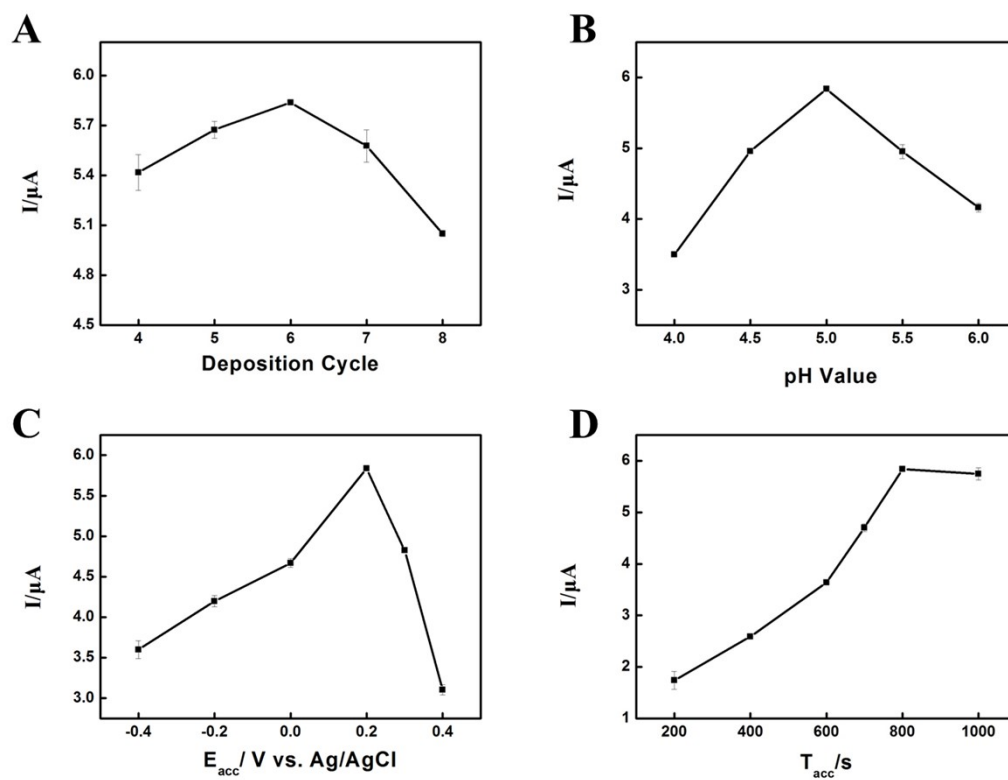

Supplement: d2ay00417h1.pdf [file d2ay00417h1.pdf]
